# Supplementary material for: Fluorescent Aptasensor and Colorimetric Aptablot for p-tau231 Detection: Toward Early Diagnosis of Alzheimer’s Disease
Source: Biomedicines. 2022 Jan 1;10(1):93. doi: 10.3390/biomedicines10010093 (PMC8772959; doi:10.3390/biomedicines10010093)
Supplement: Supplementary file 1 [file biomedicines-10-00093-s001.zip › biomedicines-1521048-supplementary.pdf]

Supplementary Information for

## **Fluorescent Aptasensor and Colorimetric Aptablot for p-tau231**

### **Detection: Toward Early Diagnosis of Alzheimer's Disease**

**Le Minh Tu Phan<sup>a,b,\*</sup>, and Sungbo Cho<sup>a,c,\*</sup>**

*<sup>a</sup>Department of Electronic Engineering, Gachon University, Seongnam-si, Gyeonggi-do, 13120, Republic of Korea*

*<sup>b</sup>School of Medicine and Pharmacy, The University of Danang, Danang 550000, Vietnam*

*<sup>c</sup>Department of Health Sciences and Technology, GAIHST, Gachon University, Incheon, 21999, Republic of Korea*

*\* Corresponding authors: plmtu@smp.udn.vn (Le Minh Tu Phan); sbcho@gachon.ac.kr (Sungbo Cho)*

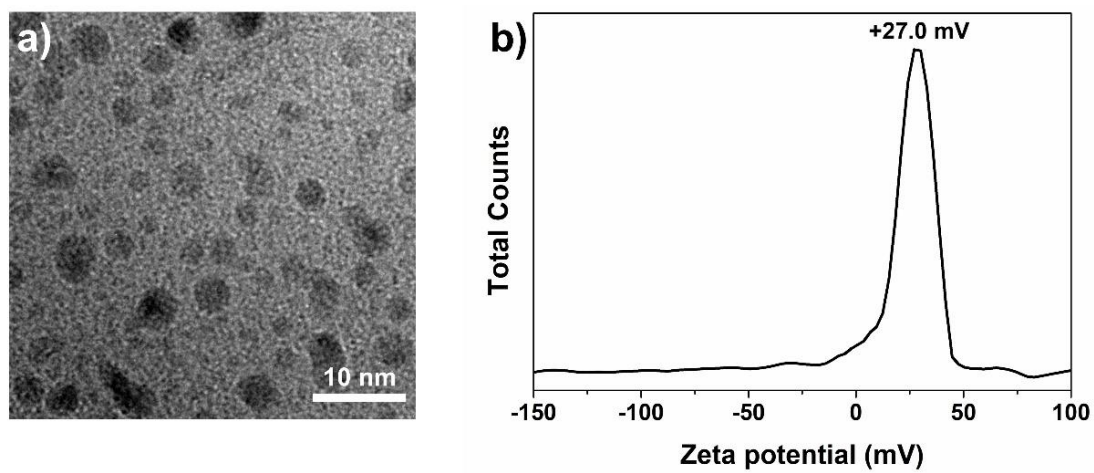

**Figure S1.** a) TEM image of NCDs. b) Zeta potential distribution of NCDs.

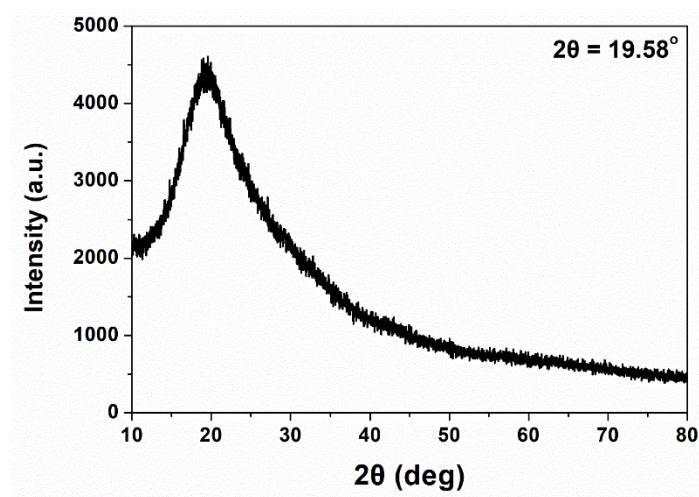

**Figure S2.** XRD pattern of NCDs.

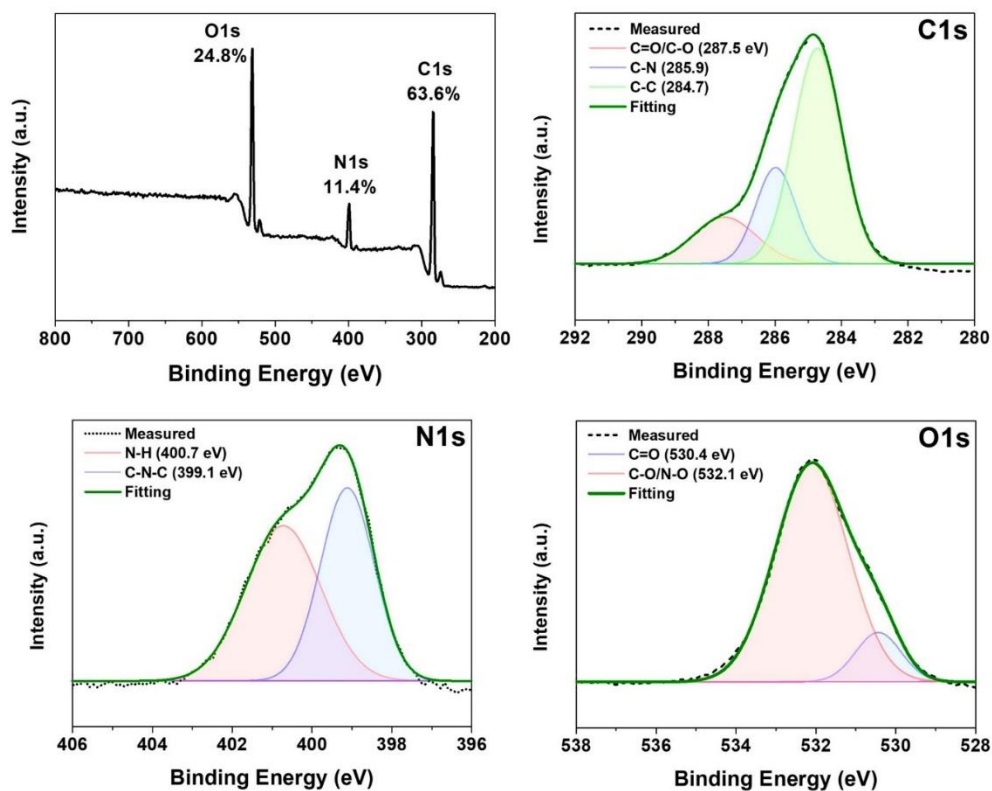

**Figure S3.** XPS survey scan of NCDs including full scan spectrum and high-resolution survey scan of C1s, N1s, and O1s.

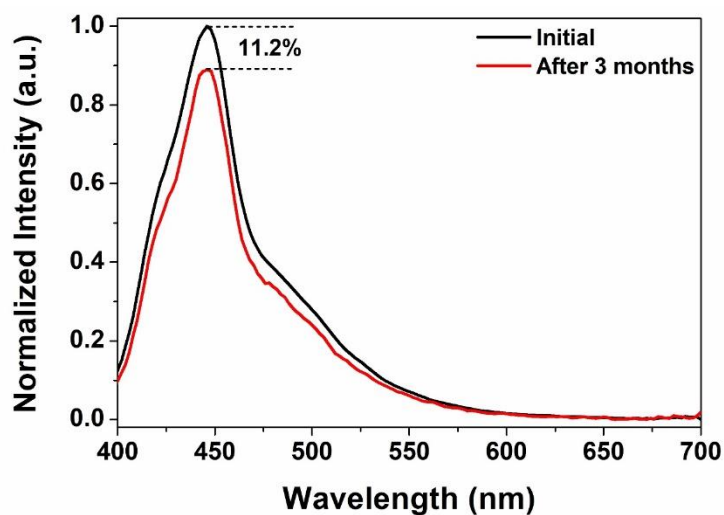

**Figure S4.** Fluorescence stability of NCDs after storing for 3 months at 4 °C in the dark environment.

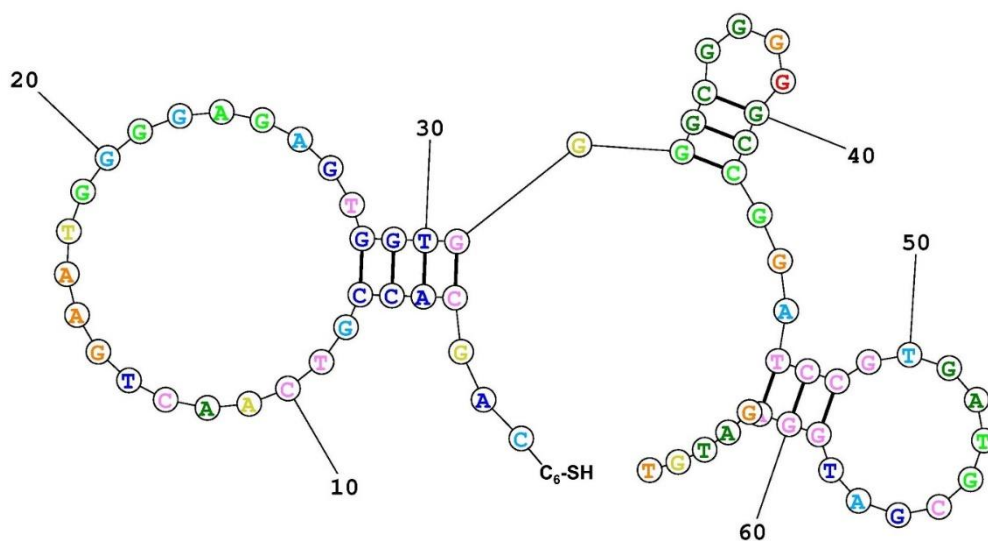

**Figure S5.** Secondary structure prediction of p-tau231 aptamer sequence with lowest free energy using RNAstructure software.

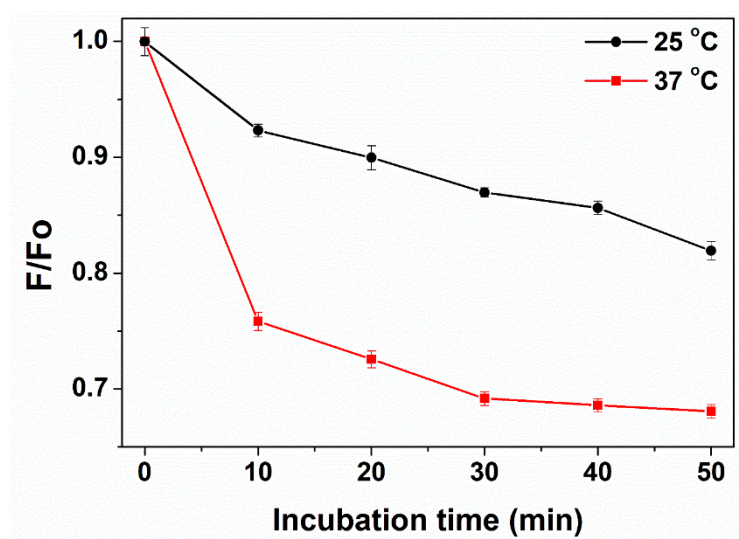

**Figure S6.** Influence of incubation temperature and incubation time on the quenching effect of p-tau231 aptamer toward NCDs.

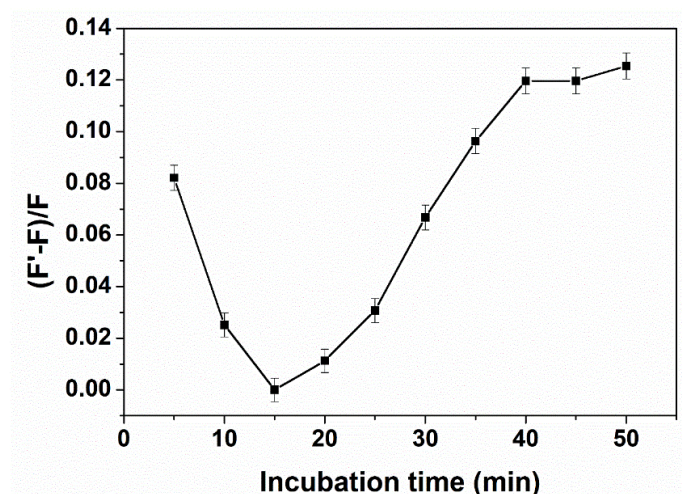

**Figure S7.** Effect of incubation time after p-tau231 addition on recovery efficiency of fluorescent NCDs.

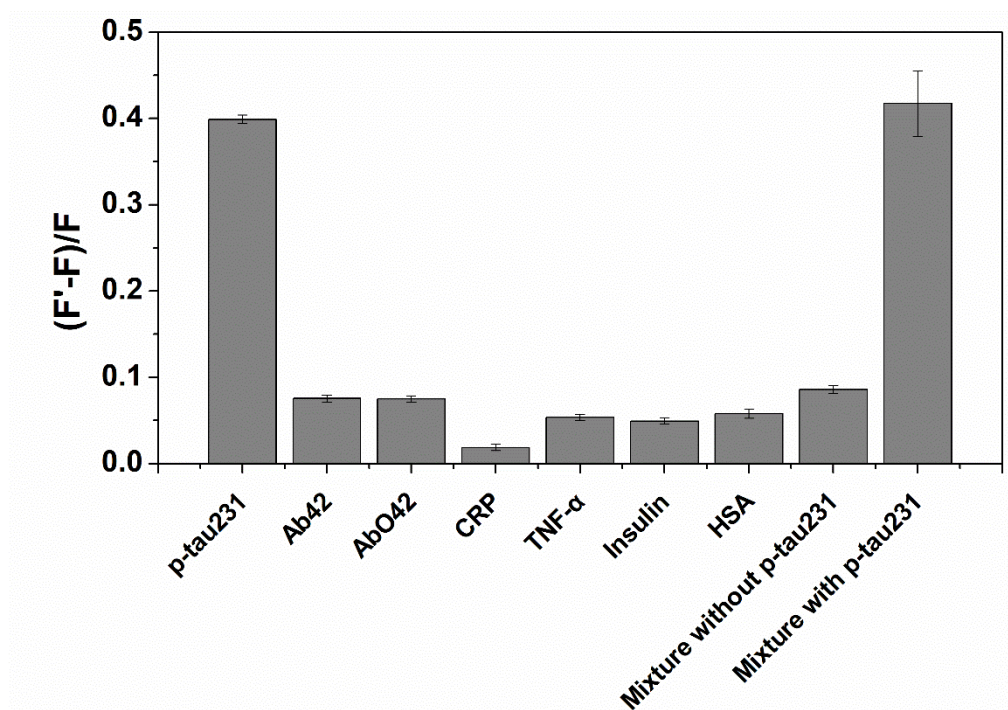

**Figure S8.** Specificity validation of turn-on fluorescent aptasensor for p-tau231 peptide by examining effect of interferences in spiked serum samples including p-tau181 peptide, amyloid beta 42 monomer (Ab42), amyloid beta 42 oligomer (AbO42), C-Reactive protein (CRP), tumor necrosis factor (TNF), insulin, human serum albumin (HSA).
